# Supplementary material
Source: PubMed Central journal article supplement (PMC4911338)
Supplement: NIHMS779509-supplement-SDC.pdf [file NIHMS779509-supplement-SDC.pdf]

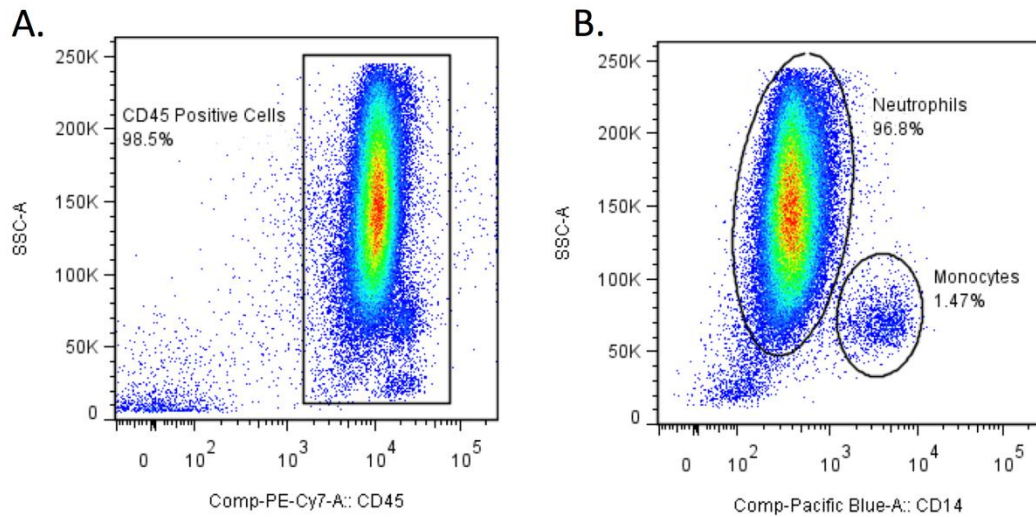

**Supplementary Figure 1.** Flow cytometry of the cellular fraction of luminal aspirates. Luminal aspirates were centrifuged to isolate the cellular components, and labelled with anti-CD45 and anti-14 antibodies to identify neutrophils and monocytes. **(A)** All cells / ungated. **(B)** CD45+ cells from outlined gate in **(A)**. CD14 high/positive was labeled as monocytes and CD14 low/negative was labeled as neutrophils.

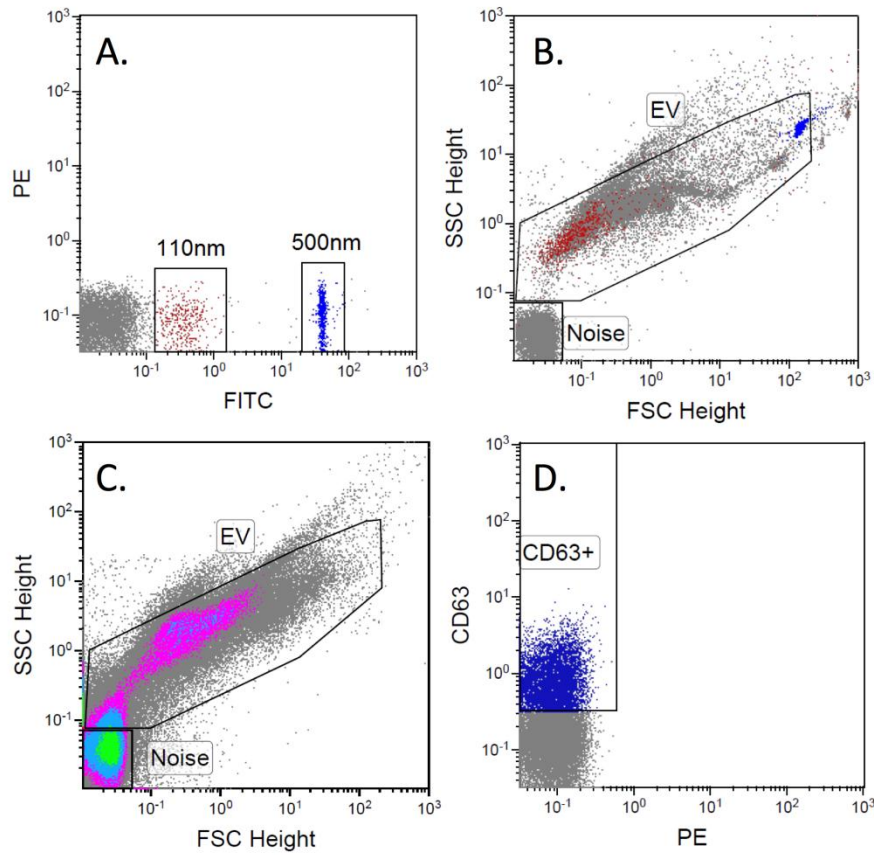

**Supplementary Figure 2.** Particle-size-based gating strategy. The *ApogeeMix* was subjected to flow cytometric analysis. The EV gate was designed to include both population of fluorescent beads (110nm and 500nm) and the area that are most likely show particles smaller than 500nm (A & B). (C) Representative colonic EV sample from IBD patients (41%). (D) CD63 positive gate was created based on the same sample single stained with anti-CD63 (18.4%).

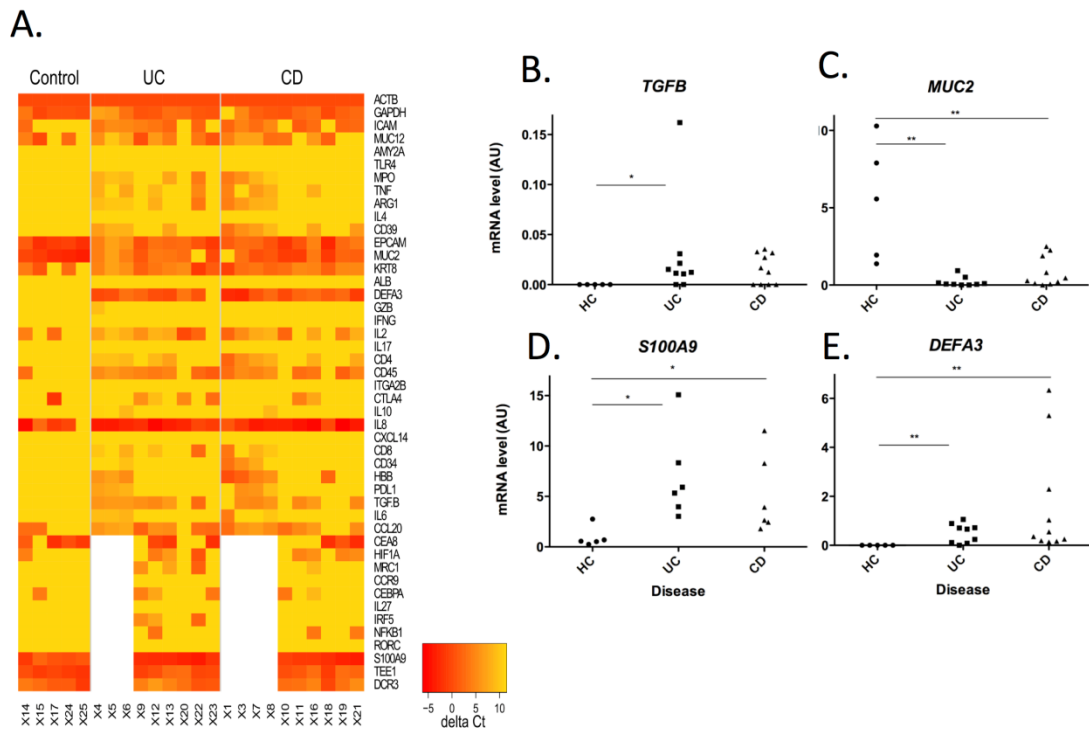

**Supplementary Figure. 3.** Levels of EV mRNA in colonic samples from IBD patients and controls. **(A)** Heatmap of mRNA, normalized by ACTB, was compared among healthy control (HC), UC, and CD; yellow indicates lower expression and red indicates higher expression. **(B-E)** Scatter plots of mRNA levels (Arbitrary Unit, AU) in samples from healthy controls (HC, N=5), UC (N=9), and CD (N=10) patients, as assessed by RT-PCR.

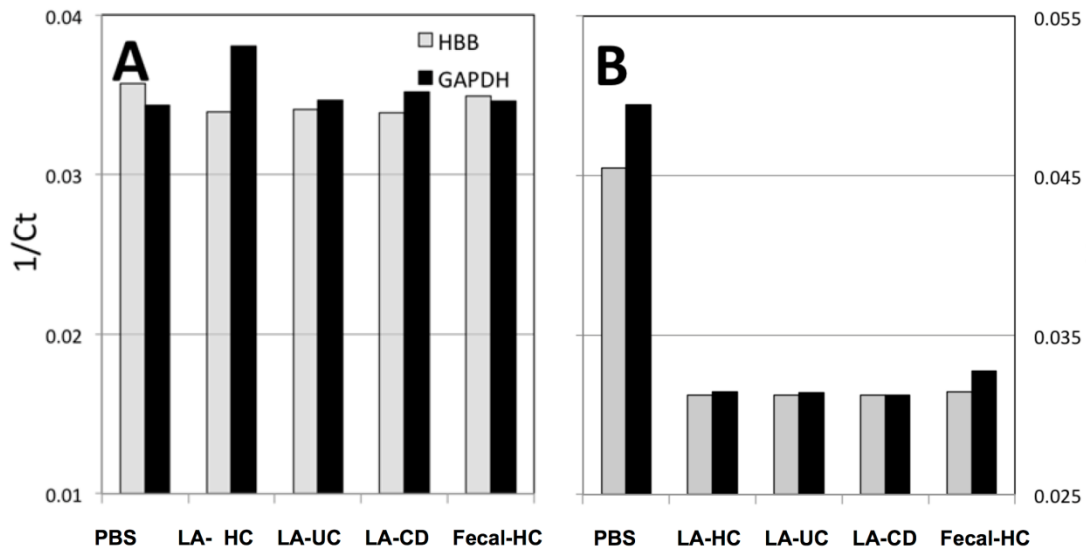

**Supplementary Figure 4.** Stability of EV mRNA in LA and stool. **(A)** PBS, LA or fecal supernatants were incubated with fetal calf serum-derived purified standard EV at 37<sup>0</sup>C for 30 minutes, then bovine Hemoglobin (HBB) and GAPDH mRNA levels (1/Ct) were quantified as described in the Methods. **(B)** Naked rat total RNA was incubated with PBS, LA, or fecal supernatants at 37<sup>0</sup>C for 30 minutes, then rat ACTB *and* GAPDH mRNA levels (1/Ct) were quantified.

## Supplementary Table 1.

### Primer sequences used for PCR

| Gene           | Forward (5'-3')             | Reverse (5'-3')              |
|----------------|-----------------------------|------------------------------|
| <b>Human</b>   |                             |                              |
| <i>ACTB</i>    | CCTGGCAGCCAGCACAAAT         | GCCGATCCACACGGAGTACT         |
| <i>GAPDH</i>   | CCCACTCCTCCACCTTTGAC        | CATACCAGGAAATGAGCTTGACAA     |
| <i>MUC2</i>    | GCGGGACATTTGTTCATGTACTC     | GATGTGGGTGTAGGTGTGTGTCA      |
| <i>MUC12</i>   | GCCTTGAGAACGCCTACAACA       | GAGCTCTGTGCCAGAGTCAACA       |
| <i>ICAM</i>    | TCCCCCGGTATGAGATTG          | GCCTGCAGTGCCATTATG           |
| <i>EPCAM</i>   | CAGTTGTTGCTGGAATTGTTGTG     | CATCTCACCCATCTCCTTTATCTCA    |
| <i>KRT8</i>    | CTGGGATGCAGAACATGAGTATTC    | GCTTGTGAGGCCCCCATAG          |
| <i>EGFR</i>    | CCTTGCCGCAAAGTGTGTAA        | TGAAGGAGTCACCCCTAAATGC       |
| <i>CEACEM8</i> | AGTGCAGTGGCAGCATCTCA        | AAATTAGCCGGGCGTTGTG          |
| <i>MMP7</i>    | CGGATGGTAGCAGTCTAGGGATT     | GGAATGTCCCATACCCAAAGAA       |
| <i>TFF1</i>    | CCCCAGCACGGTGATTAGTC        | CAGAGCAGTCAATCTGTGTTGTGA     |
| <i>ALB</i>     | TGCAAGGCTGACGATAAGGA        | GTAGGCTGAGATGCTTTTAAATGTGA   |
| <i>AMY2A</i>   | ACAGAGGATTCATTGTTTTCAACAAT  | ACAGTATGTGCCAGCAGGAAGA       |
| <i>IL2</i>     | GAACTAAAGGGATCTGAAACAACATTC | TGTTGAGATGATGCTTTGACAAAA     |
| <i>IL4</i>     | CACAGGCACAAGCAGCTGAT        | CCTTCACAGGACAGGAATTCAG       |
| <i>IL17</i>    | CATGAACTCTGTCCCCATCCA       | TCCAGCCGGAAGGAGTTG           |
| <i>IL27</i>    | CCAAGGCTGGGCACTCAGT         | GATGCCAAGACTCCAGTCCATAA      |
| <i>TNF</i>     | CGAAGGCTCCAAAGAAGACAGT      | CAGGGCAATGATCCCAAAGT         |
| <i>TNFSF15</i> | TGCGAAGTAGGTAGCAACTGGTT     | CCATTAGCTTGTCCCCTTCTTG       |
| <i>DCR3</i>    | CAATGTGCCAGGCTCTTCCT        | TCACACTCCTCAGCTCCTGGTA       |
| <i>GZB</i>     | GCGGTGGCTTCTTGATACAA        | CCAAGGTGACATTTATGGAGCTT      |
| <i>MPO</i>     | ACTGCCTGGGTTCCAATCC         | TGTTTAAGGAGGGTAATTTGCTCAA    |
| <i>DEFA3</i>   | CCAGGCTCAAGGAAAAACATG       | CTGGTAGATGCAGGTTCCATAGC      |
| <i>TLR4</i>    | GAAGAGTGAGTGGTGAAGTATGAA    | ATGGCAGCATCATTGTTCTCATC      |
| <i>IFNG</i>    | GGAGACCATCAAGGAAGACATGA     | GCTTTGCGTTGGACATTCAA         |
| <i>IRF5</i>    | CCCCAGAGCTGGTTGTTAA         | CTGGAGTGTGCAGAGATGACACA      |
| <i>IL10</i>    | GCCATGAGTGAGTTTGACATCTTC    | GATTTTGAGACCTCTAATTTATGTCCTA |
| <i>CTLA4</i>   | CACTGAGGTCCGGGTGACA         | GTAGGTTGCCGCACAGACTTC        |
| <i>PDL1</i>    | TCCAAGAGAGAGGAGAAGCTTTTC    | GCTGTATGGTTTTCTCAGGATCT      |
| <i>ARG1</i>    | AGACACCAGAAGAAGTAACTCGAACA  | TCCCAGCAAGTCCGAAAC           |
| <i>TGFB1</i>   | CTGCTGAGGCTCAAGTTAAAAGTG    | TGAGGTATCGCCAGGAATTGT        |
| <i>HBB</i>     | GCCCATCACTTTGGCAAAGA        | CCAGCCACCACTTCTGATAGG        |
| <i>CD4</i>     | AAATGCCACACGGCTCTCA         | GGGTGCTGTGCTTCTGTGAAC        |
| <i>CD8</i>     | CCGAGAGAACGAGGGCTACTATT     | GCACGAAGTGGCTGAAGTACAT       |
| <i>CD34</i>    | CAGGGAAAGGCCAGTGTGAA        | ACCACGTGTTGTCTTGCTGAAT       |

|               |                              |                            |
|---------------|------------------------------|----------------------------|
| <i>CD45</i>   | AAGCTCCCTGAAGCAAAGGAA        | GCAGGACCATTGACAGAATGTTC    |
| <i>ITGA2B</i> | TGCTGCTGCTCACCATCCT          | CCGGTTCCGCTTGAAGAAG        |
| <i>IL6</i>    | TCATCACTGGTCTTTTGGAGTTTG     | TCTGCACAGCTCTGGCTTGT       |
| <i>IL8</i>    | TGCTAAAGAACTTAGATGTCAGTGCAT  | TGGTCCACTCTCAATCACTCTCA    |
| <i>CCL20</i>  | GATACACAGACCGTATTCTTCATCCTAA | TGAAAGATGATAGCATTGATGTCACA |
| <i>CXCL14</i> | AAGCTGGAAATGAAGCCAAAGT       | ACACGCTCTTGGTGGTGATG       |
| <i>CCR9</i>   | GGATTCCGCTTATTCCCTTGGT       | TGCGAACCCAGCTGTTATAATCT    |
| <i>CD39</i>   | CCCAGCTGAGCAACCATTGT         | GACCAGGGAGAATAGAACCATGA    |
| <i>MRC1</i>   | AAAGCTGACACAAGGAAGATGGA      | TCAGGAGGATCACAATGATGACTAC  |
| <i>CEBPA</i>  | TTGTACTGTATGCCTTCAGCATTG     | TCGGCTGATAAAGCAAAATATTTG   |
| <i>NFKB1</i>  | GGATCACAGCTGCTTTCTGTGTG      | CGACCGTGATACCTTTAATGACAA   |
| <i>HIF1A</i>  | TTGCCAGCTCAAAAGAAAACAA       | ACCAACAGGGTAGGCAGAACA      |
| <i>R2RX7</i>  | CTGTGAGGAAGCCCAAGCA          | CAGAATCACCTGAAGGCTTCTTCT   |
| <i>RORC</i>   | CGGAAGGCAAGATCAGATCCT        | CCCTGGTGTCCCTCCATGCT       |
| <i>S100A8</i> | GGCCAAGCCTAACCGCTATAA        | CTTCTGAAAGACAGCTGACAAGAGA  |
| <i>S100A9</i> | CTGAGCTTCGAGGAGTTCATCA       | CGTCACCCTCGTGCATCTT        |
| <i>SOCS3</i>  | GCTAAGAGATTGCCTTAAATGCT      | CTTGGTGCCCTCCAGTGAGT       |
| <b>Bovine</b> |                              |                            |
| <i>HBB</i>    | GGCATGAAGCATCTCGATGA         | CAGCTTATCACAGTGCAGCTCACT   |
| <i>GAPDH</i>  | AGGTTGTCTCCTGCGACTTCA        | GTGGTCGTTGAGGGCAATG        |
| <b>Rat</b>    |                              |                            |
| <i>actb</i>   | TCTGTGTGGATTGGTGGCTCTA       | CTGCTTGCTGATCCACATCTG      |
| <i>gapdh</i>  | ACCAGGTTGTCTCCTGTGACTTC      | CAGGAAATGAGCTTCACAAAGTTG   |

---

### Supplementary Table 2.

Characteristics of IBD patients from who samples were obtained

| Factor                    | N=63 |
|---------------------------|------|
| Mean age (years)          | 48   |
| Gender (% male)           | 60   |
| Ulcerative colitis (%)    | 62   |
| Crohn's disease (%)       | 38   |
| Disease duration (years)  | 12   |
| Mean CRP                  | 8.3  |
| Mean HBI / SCCAI score    | 3    |
| Mean Mayo endoscopy score | 1    |
